# Supplementary material
Source: Springer Nature journal article supplement (https://www.springermedizin.de/resource/supplementary/13058_2011_2895_MOESM4_ESM.pdf/9702802)

**K8****K14****K8/K14/DAPI****K5/DAPI**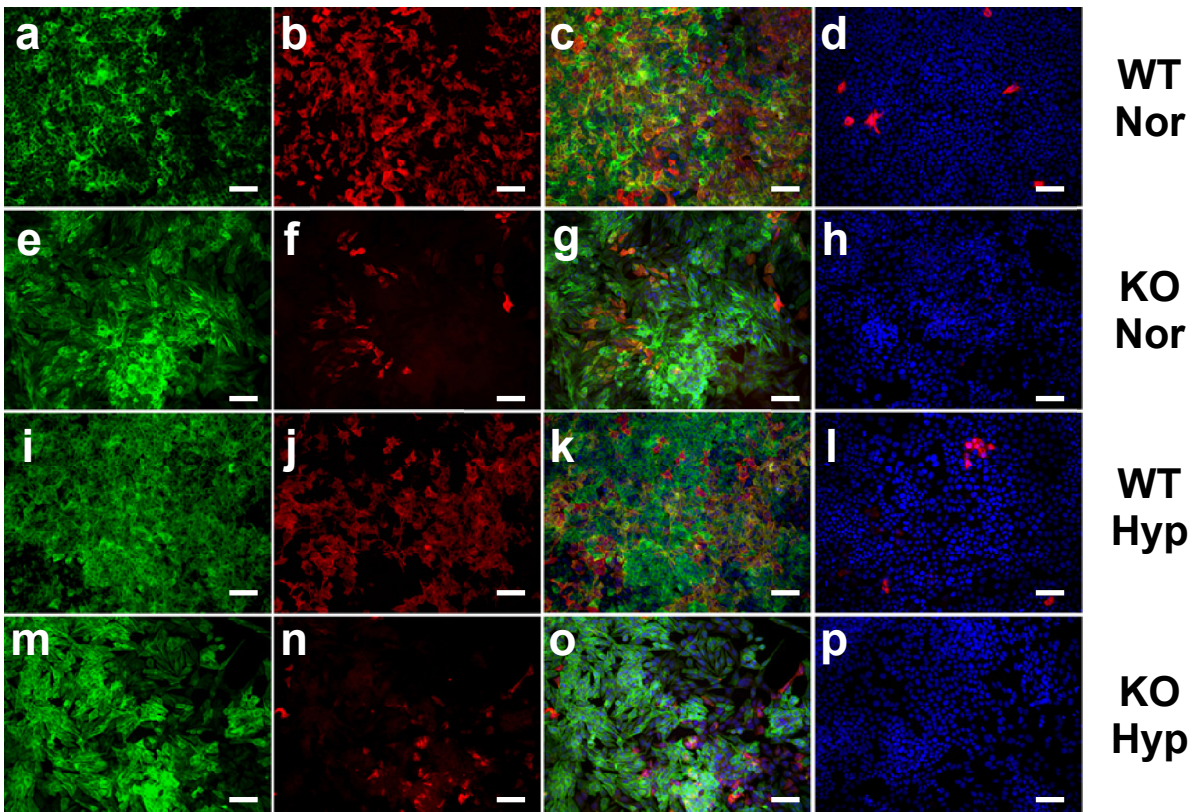

Supplement: MOESM4 [file 9702802]
